# Supplementary material for: Phase I Trial of Viral Vector-Based Personalized Vaccination Elicits Robust Neoantigen-Specific Antitumor T-Cell Responses
Source: PubMed Central journal article supplement — Clin Cancer Res. 2024 Mar 20;30(11):2412–23. doi: 10.1158/1078-0432.CCR-23-3940 (PMC11145154; doi:10.1158/1078-0432.ccr-23-3940), 2024-03-20
Supplement: ccr-23-3940_supplementary_figure_1_suppsf1.pdf [file ccr-23-3940_supplementary_figure_1_suppsf1.pdf]

## Supplementary Figure 1

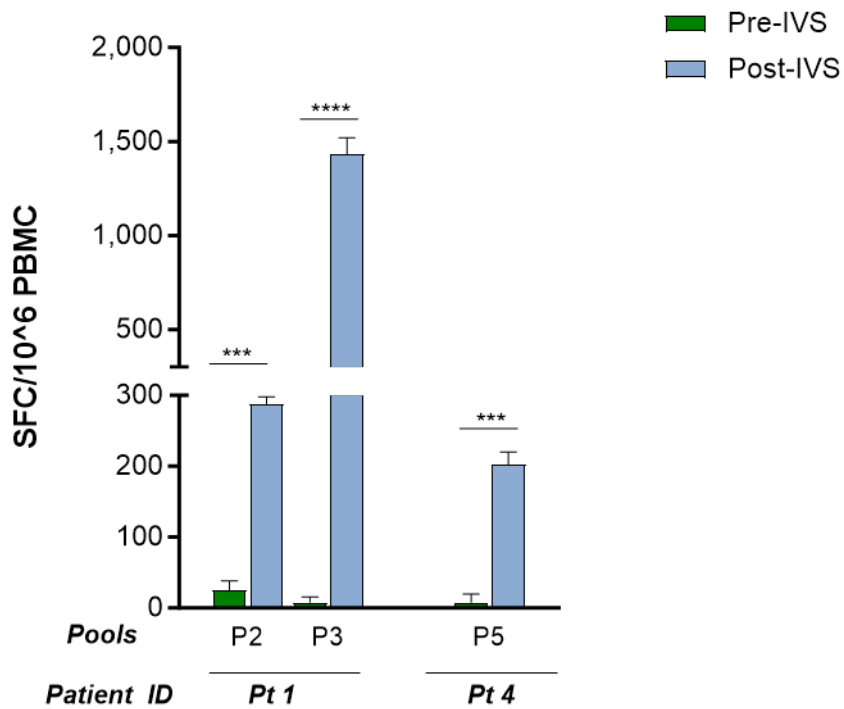

**Supplementary Figure 1. IFN- $\gamma$  ELISpot response post-IVS.** Patient PBMCs (Pt1 and Pt4) from available post vaccination time points were in vitro restimulated with patient specific pools which did not elicit a positive immune response ex-vivo. Graphs show mean SFC per 10<sup>6</sup> PBMCs for triplicate ELISpot wells. An unpaired t test was used to detect significant differences between pre-IVS and post-IVS cultures (\*\*\*\*p <0.0001; \*\*\*p<0.001).
